# Supplementary material for: miR-369-3p modulates inducible nitric oxide synthase and is involved in regulation of chronic inflammatory response
Source: PubMed Central journal article supplement (PMC7525504; doi:10.1038/s41598-020-72991-8), 2020-09-29
Supplement: 41598_2020_72991_MOESM1_ESM.pdf [file 41598_2020_72991_MOESM1_ESM.pdf]

**SUPPLEMENTARY FIGURE**

**miR-369-3p modulates inducible nitric oxide synthase and is involved  
in regulation of chronic inflammatory response**

Viviana Scalavino<sup>1\*</sup>, Marina Liso<sup>1\*</sup>, Elisabetta Cavalcanti<sup>1</sup>, Isabella Gigante<sup>1</sup>, Antonio Lippolis<sup>1</sup>,  
Mauro Mastronardi<sup>1</sup>, Marcello Chieppa<sup>1</sup> and Grazia Serino<sup>1</sup>

<sup>1</sup>National Institute of Gastroenterology “S. de Bellis”, Research Hospital, 70013, Castellana Grotte  
(Bari), Italy;

\*These authors have equally contributed to this work

**Corresponding author:** Grazia Serino, National Institute of Gastroenterology “S. de Bellis”,  
Research Hospital, Via Turi, 27 70013, Castellana Grotte, Bari, Italy.

email: [grazia.serino@irccsdebellis.it](mailto:grazia.serino@irccsdebellis.it)

ORCID ID: <https://orcid.org/0000-0002-2971-0802>

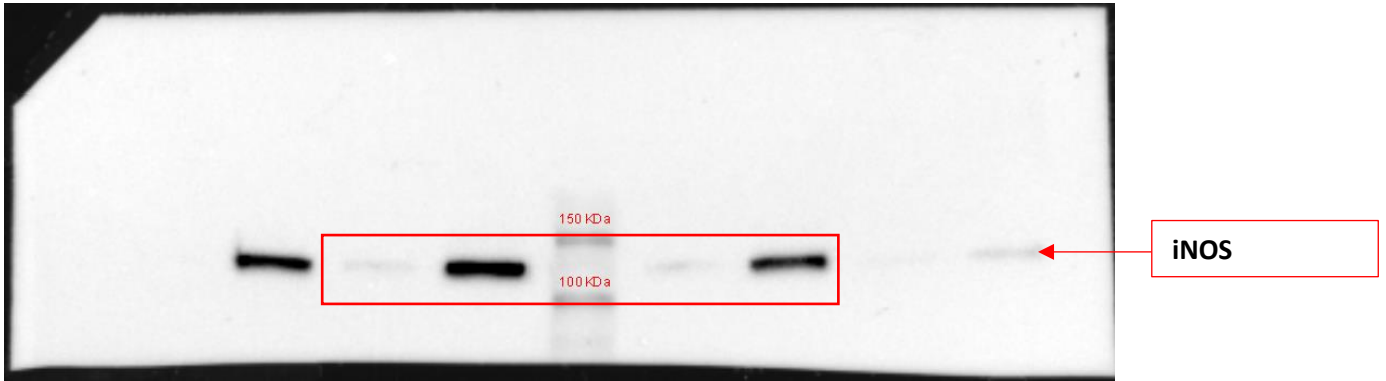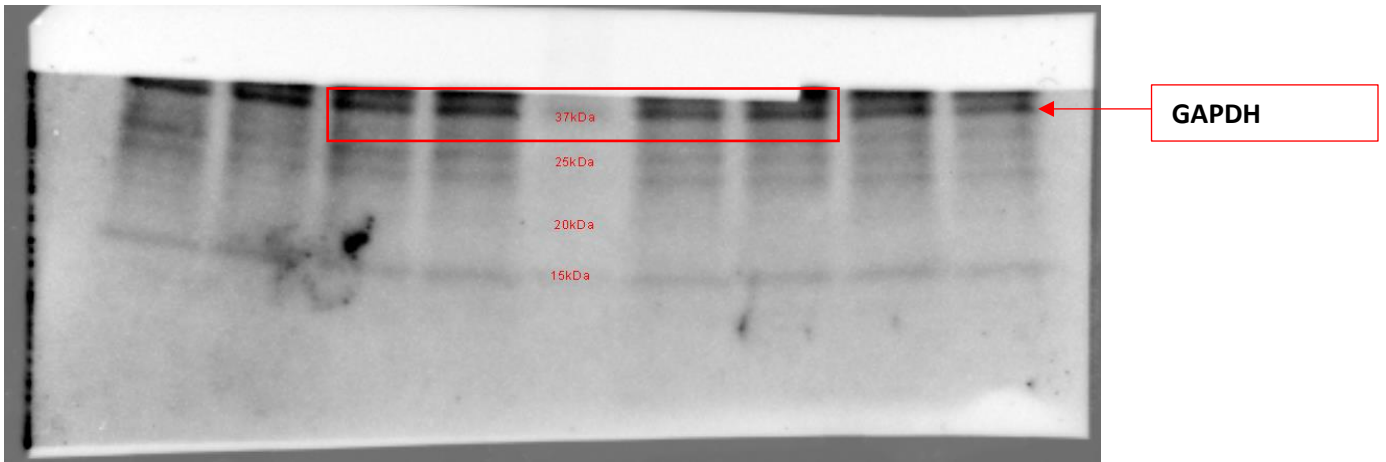

**Supplementary Figure 1.** Uncropped versions of blots shown in Figure 2B. Blot used for the paper's figure are indicated in red lettering.

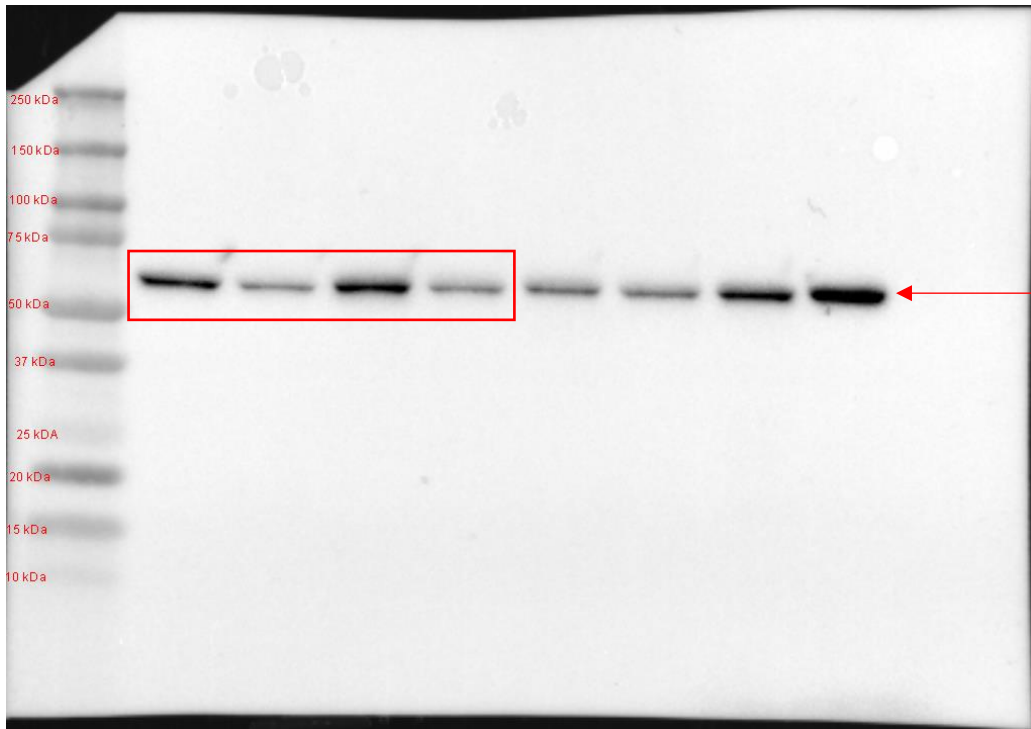

NF- $\kappa$ B p65  
Cytoplasm

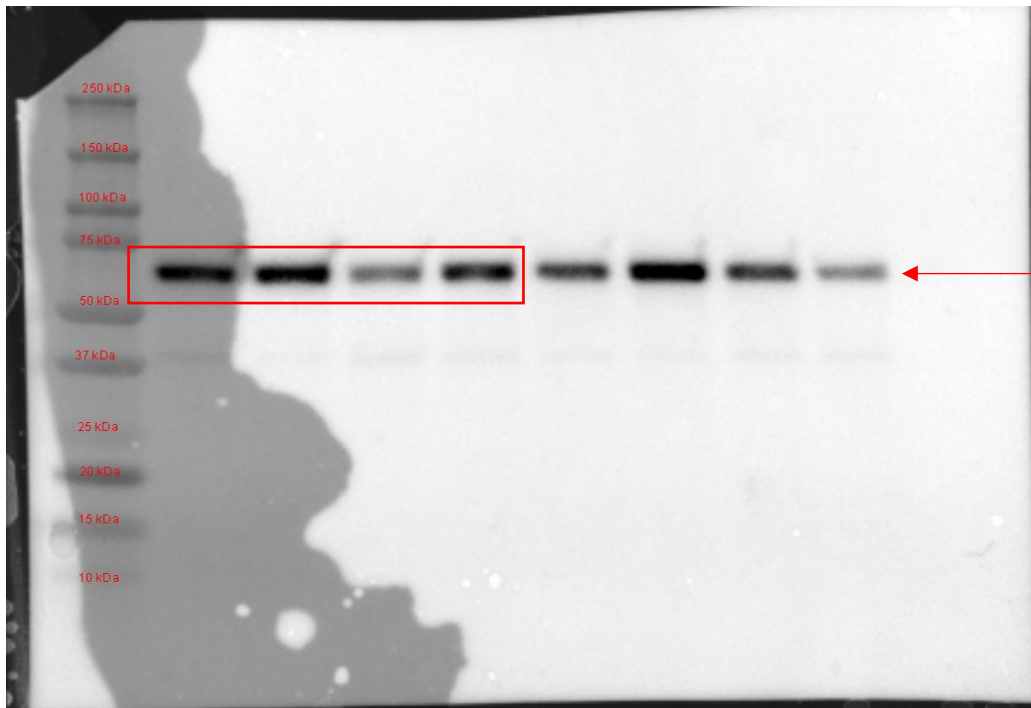

pNF- $\kappa$ B p65  
Cytoplasm

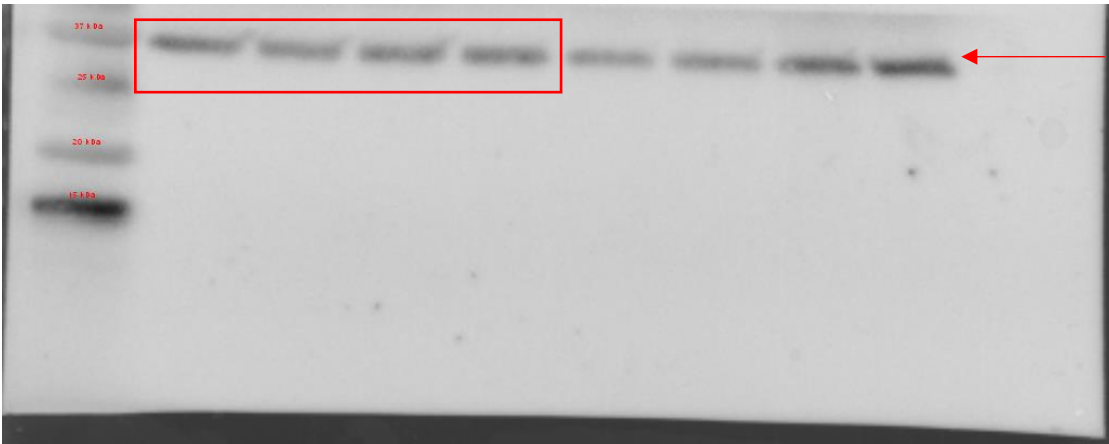

**GAPDH**  
**Cytoplasm**

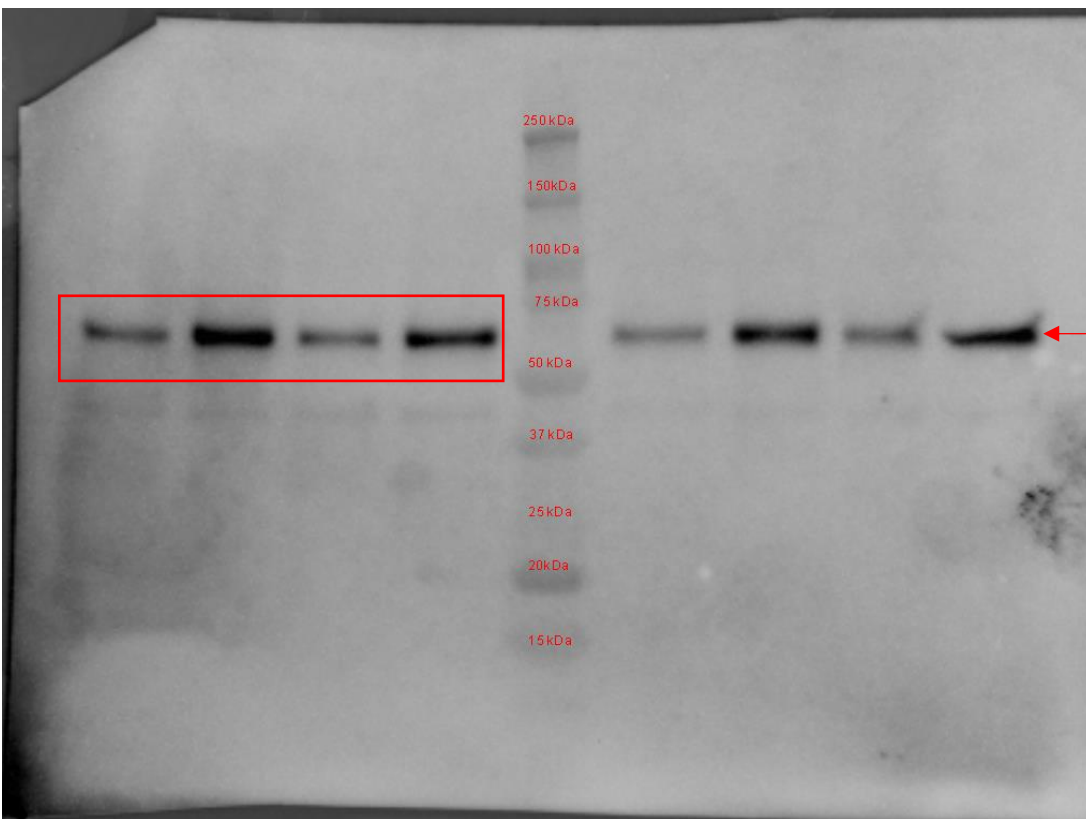

**NF-kB p65**  
**Nucleus**

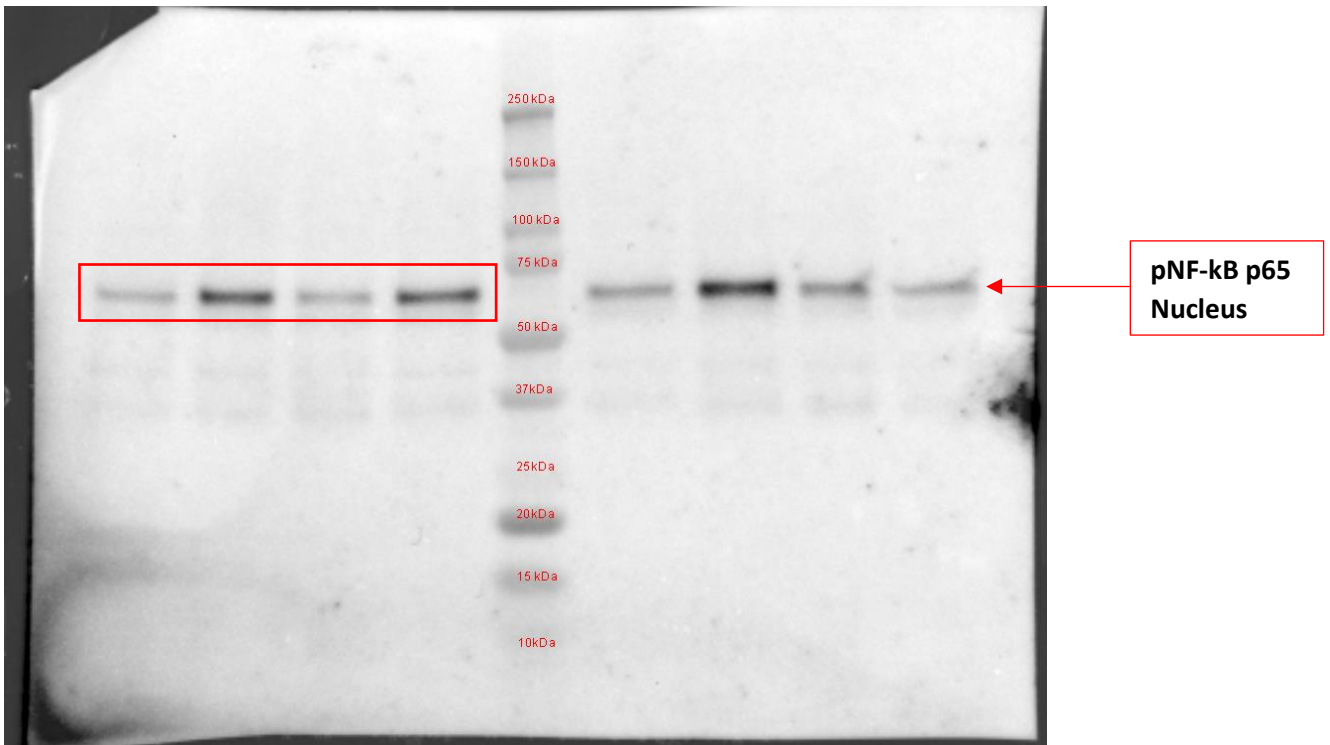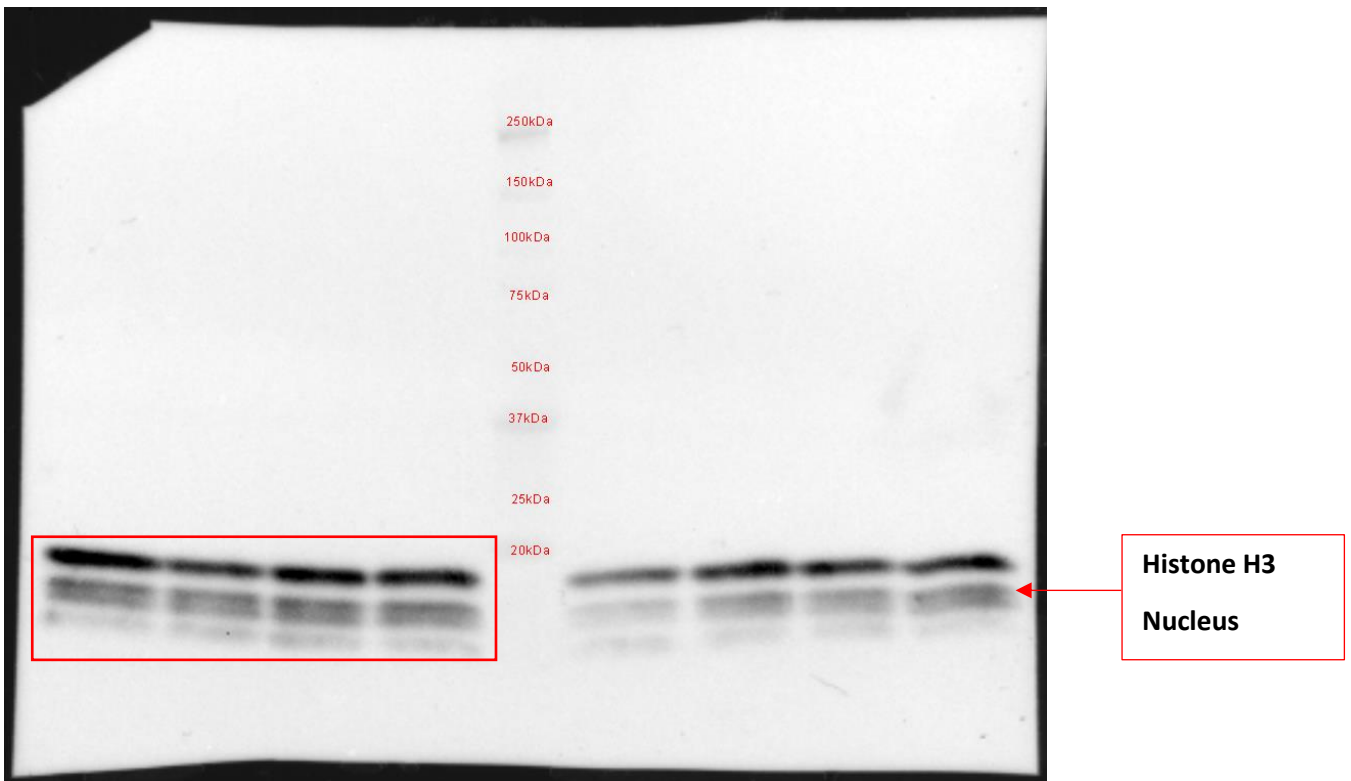

**Supplementary Figure 2.** Uncropped versions of blots shown in Figure 5A. Blot used for the paper's figure are indicated in red lettering.
